# Supplementary material for: The role of CD47 in immune escape of colon cancer and its correlation with heterogeneity of tumor immune microenvironment
Source: PeerJ journal article supplement (doi:10.7717/peerj.18579), 2024-12-09
Supplement: Data.zip [file Data.zip]

## Sheet: Sheet1
id	logFC
ARL4AP1	3.55915
IFNK	4.34404
FBXO40	4.32688
AC100800.1	4.18837
RNU5E-1	3.82226
RNU5A-1	4.40734
RNU6-942P	3.58939
Y_RNA	3.85311
AC022973.1	3.77222
RNU6-433P	3.58393
RNU6-251P	3.85391
RNU5B-1	4.68284
RNU5D-1	4.37558
RN7SKP203	3.92679
RNVU1-33	3.67267
Y_RNA	3.64762
SNORA80A	3.68695
RNU6-82P	3.54076
SNORA74A	4.40183
RNU6-151P	3.62881
RNU6-268P	3.86833
RNY1	4.84272
Y_RNA	3.6255
RNU4-40P	3.85209
RN7SKP227	4.13223
Y_RNA	3.83857
RNU6-522P	3.68471
RN7SKP71	3.62635
RNU6-60P	3.67233
RN7SKP9	3.94534
RN7SKP189	3.69022
SNORA23	4.09096
Y_RNA	3.62472
Y_RNA	4.05135
AL162581.1	5.22837
Y_RNA	3.89776
RN7SKP186	4.07271
RNY3	4.58587
AC106827.1	3.64809
GPR52	3.74466
BMP2KL	3.93469
RNU6-946P	3.52745
SNORA70G	3.52336
RNU1-11P	5.25621
AP000751.1	3.57587
SNORA37	3.71531
Y_RNA	3.87113
Y_RNA	3.53953
Y_RNA	3.5837
SNORD56B	3.50288
SNORA53	3.93769
AC078860.1	3.69096
SNORA12	4.21173
EIF4E2P1	4.15415
RSU1P3	3.92353
RAD51AP1P1	4.59596
RPL23AP17	3.54252
AL513475.1	3.53628
AL356776.1	3.7576
AL139274.1	5.04013
AL589655.1	4.91674
AL357054.1	3.66314
RNU4ATAC16P	3.83395
TMEM14EP	4.25284
AC064874.1	4.11365
RN7SKP158	3.56335
RNU2-59P	3.69224
RNU2-23P	3.5676
RN7SKP8	3.75415
RNU2-61P	4.12126
RPL17P17	4.07895
AL590632.1	3.81061
AL391097.1	3.62758
RAD17P2	3.98174
DIAPH3-AS2	3.53436
CCNJP2	4.38695
USP12P2	3.50564
DPRXP1	4.25574
LPP-AS1	4.39445
E2F3-IT1	4.09951
AL034349.1	4.27404
VPS26BP1	3.50856
AL365258.1	3.64061
AL513412.1	3.6753
AP004289.1	3.87102
CHCHD4P5	3.77344
DOCK4-AS1	3.71543
EIF2S2P5	3.5802
AL512326.3	4.33661
FAF1-AS1	3.75499
HSPE1P13	4.17522
PRICKLE2-AS3	3.71649
MTND4P32	3.7923
AF178030.1	3.57008
AC003989.1	3.71861
AL591719.1	3.70461
AL512604.1	3.90385
MTATP6P19	3.82544
AC002381.1	3.7541
AC106873.1	3.83551
AL357552.2	3.50339
SUMO2P8	3.59563
AL353771.1	3.72385
RLIMP1	3.61409
RABGAP1L-AS1	3.54117
METTL21AP1	3.85802
MTCYBP32	4.47134
MTND2P2	4.22922
AL360091.2	3.63403
HSPE1P28	3.71751
MTND5P14	3.72413
AL390774.2	3.7605
AC022537.1	3.96977
SETP10	3.67076
USP12-AS1	4.75099
MTND1P32	4.04312
AL139120.1	4.07914
AL133480.1	3.87901
PBX1-AS1	3.66806
LATS2-AS1	3.52153
AL606517.1	4.05608
EDDM3CP	4.47003
AL391863.2	3.59179
TPMTP2	3.58087
AL606517.2	4.33954
PIGFP2	4.07661
AC069079.1	4.02138
Z84478.1	3.86699
HNRNPA1P29	3.50698
MTND1P21	3.64373
RC3H1-IT1	3.96752
AC241520.1	3.94326
AL354794.1	3.74732
RPL23AP23	3.62677
TIMM9P1	3.64551
AC013410.1	3.5289
Z99127.2	3.81466
RPS27AP8	3.81781
AP004289.2	4.32823
AL163192.1	3.72354
NFIA-AS1	3.80064
CELF2-AS2	4.37979
RNU1-88P	5.40881
SCARNA7	4.35488
RNU7-80P	3.7747
RNVU1-2	3.61386
AC090571.1	3.78091
SCARNA10	4.09006
AC108693.1	3.53811
COX6CP14	3.55839
AC092910.1	3.53222
MAGI1-AS1	4.2786
AC092910.2	3.56988
AC114982.2	3.78822
AC098869.1	3.79142
RN7SL57P	4.1132
ZBTB20-AS5	3.84776
RPL23AP40	3.69783
RN7SL683P	4.1019
RN7SL141P	3.90184
AC022973.2	3.90185
RN7SL430P	3.95209
RN7SL151P	3.81422
AC139451.1	3.51433
AC087257.1	3.78353
ATG10-AS1	3.79261
KCTD9P5	3.68283
STX18-IT1	3.55772
AC055733.1	4.18969
CBX3P3	3.53546
RASA2-IT1	3.94879
AC026124.1	3.75773
SMAD1-AS2	4.24525
AC055733.2	3.50804
AC096741.1	4.1246
AC018797.2	3.52665
AC113398.2	3.93211
AC055733.3	3.53818
RNU7-124P	3.63748
SCARNA5	4.4628
RNU6-1045P	3.63193
SNORA74D	3.62548
RNA5SP33	3.60073
AC010359.1	3.77702
SCARNA3	4.02193
SNORA70	3.62658
AC005631.1	3.65105
AP003696.1	3.97495
AC022778.1	4.06788
AC079209.2	3.82338
AC018607.1	3.73639
AP002453.1	3.58636
AC100763.1	4.44033
AC011092.2	3.59756
AC073651.1	3.51955
TAS2R63P	3.57816
TAS2R30	3.57356
AC078962.3	3.7193
AC009509.4	3.78334
AC125612.1	3.57897
AC012555.2	3.6538
SNRPGP18	4.01774
AC073569.1	3.86888
ZNF75BP	3.78498
AC130895.1	4.18519
AC135626.1	3.51112
AL358333.2	3.53693
AC005230.1	3.59027
EIF1AXP2	3.68126
AL355075.4	3.93644
FOXN3-AS2	4.14979
AF107885.2	4.15132
AC087286.1	4.85538
AC023813.2	4.24207
AC007496.1	3.9314
AC109597.1	3.78526
AC011939.2	4.29422
AL157402.2	4.15095
AC007151.1	3.78813
AL354943.1	3.56633
AC104982.2	3.7984
AC007431.1	3.54197
AP000897.1	3.79117
MIR3140	4.03186
MIR3609	5.03832
AP000919.2	3.66894
AC090220.1	3.6462
AC016493.1	3.51655
ADAD1P2	3.99481
AC105224.1	4.10867
AC099811.4	3.6021
BNIP3P25	3.53109
AL589863.1	3.5386
AC110792.2	3.97609
AC007161.2	3.7358
AC097639.2	3.85464
AC022022.2	3.98059
AC069431.2	4.01903
AC090953.1	4.07712
PDHA1P1	4.22897
RPAP2P1	3.85615
AC008277.2	3.78404
HMGB1P51	3.64112
SUMO2P14	3.55569
ELOCP33	3.6628
7SK	3.74907
AC005183.1	3.68206
AC108102.1	3.63253
RN7SL760P	3.56491
OR7A19P	3.66368
AP000659.1	3.69276
RN7SL166P	3.54395
RN7SL296P	3.5884
AC012150.2	3.55823
AC104763.2	3.7506
AC008833.1	3.71467
AC105429.2	3.52802
AC022960.3	3.70457
RNVU1-2A	3.78375
AC009248.2	3.67121
Metazoa_SRP	3.8508
AC091059.2	3.78034
AC011944.2	3.64631
AC120349.2	3.74366
AC016542.2	3.92128
AC009948.3	3.86585
AC010997.6	4.50162
AL390318.1	5.09425
AC010480.1	4.10537
AC110769.3	3.73987
AC008764.10	3.74143
AC008498.2	3.79442
AC016542.3	3.87455
AC027279.4	3.72792
AL138713.1	3.577
