# Supplementary material for: The role of CD47 in immune escape of colon cancer and its correlation with heterogeneity of tumor immune microenvironment
Source: PeerJ journal article supplement (doi:10.7717/peerj.18579), 2024-12-09
Supplement: FigureS1.pdf [file FigureS1.pdf]

**A**

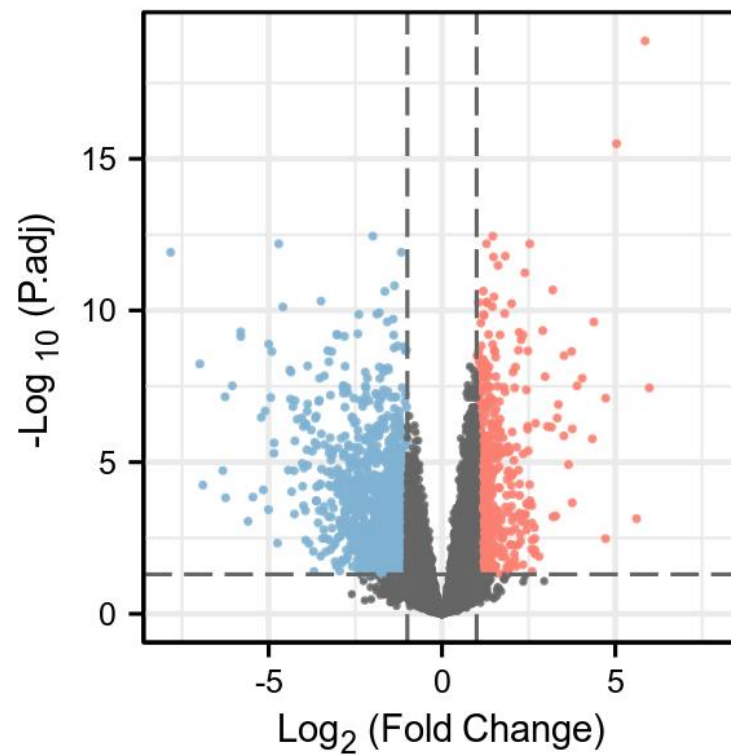

**B**

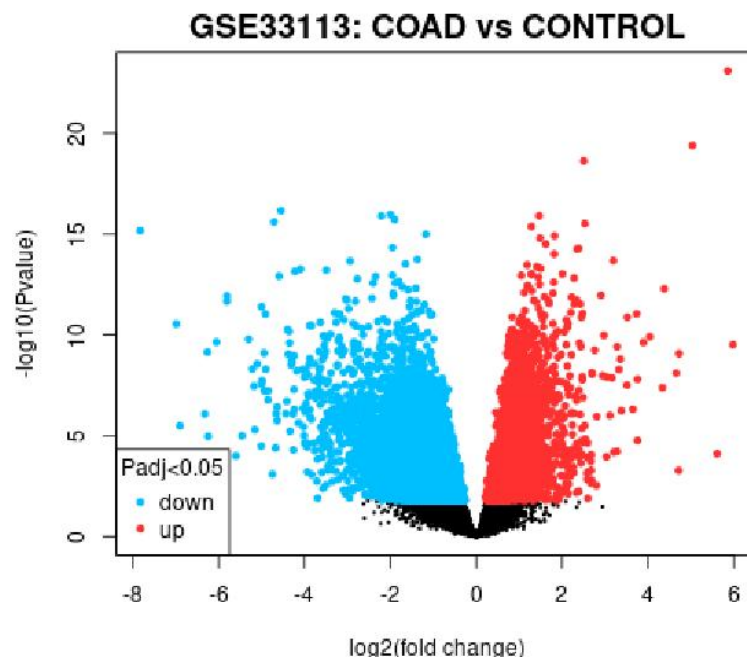

Supplementary Figure 1. CD47 high expression associated with DEGs in colon adenocarcinoma. (A) the TCGA database; (B) the GEO database.
