# Supplementary material for: The role of CD47 in immune escape of colon cancer and its correlation with heterogeneity of tumor immune microenvironment
Source: PeerJ journal article supplement (doi:10.7717/peerj.18579), 2024-12-09
Supplement: TableS1.pdf [file TableS1.pdf]

| Group information       | T.stage | N.stage | Clinical stage | Age | Gender |
|-------------------------|---------|---------|----------------|-----|--------|
| Low expression of CD47  | T3      | N0      | II             | ≥60 | Female |
| Low expression of CD47  | T3      | N2      | III            | <60 | Female |
| High expression of CD47 | T3      | N0      | II             | ≥60 | Male   |
| High expression of CD47 | T3      | N1      | III            | ≥60 | Male   |
| Low expression of CD47  | T3      | N0      | II             | ≥60 | Male   |
| High expression of CD47 | T3      | N2      | III            | ≥60 | Male   |
| High expression of CD47 | T3      | N2      | III            | ≥60 | Male   |
| Low expression of CD47  | T3      | N1      | III            | ≥60 | Male   |
| Low expression of CD47  | T2      | N0      | II             | ≥60 | Female |
| Low expression of CD47  | T3      | N2      | III            | ≥60 | Female |
| Low expression of CD47  | T4      | N0      | II             | ≥60 | Female |
| Low expression of CD47  | T3      | N0      | II             | ≥60 | Male   |
| High expression of CD47 | T3      | N2      | III            | <60 | Male   |
| Low expression of CD47  | T3      | N0      | II             | ≥60 | Female |
| Low expression of CD47  | T3      | N0      | II             | <60 | Male   |
| Low expression of CD47  | T4      | N1      | III            | ≥60 | Female |
| Low expression of CD47  | T3      | N0      | II             | ≥60 | Female |
| Low expression of CD47  | T3      | N0      | II             | ≥60 | Male   |
| High expression of CD47 | T4      | N1      | III            | ≥60 | Male   |
| Low expression of CD47  | T3      | N0      | II             | ≥60 | Male   |
| Low expression of CD47  | T2      | N0      | I              | ≥60 | Male   |
| High expression of CD47 | T3      | N1      | III            | ≥60 | Female |
| Low expression of CD47  | T3      | N2      | III            | <60 | Male   |
| Low expression of CD47  | T3      | N0      | II             | ≥60 | Male   |
| Low expression of CD47  | T3      | N2      | III            | ≥60 | Male   |
| High expression of CD47 | T3      | N1      | III            | ≥60 | Female |
| Low expression of CD47  | T3      | N0      | II             | <60 | Female |
| Low expression of CD47  | T3      | N0      | II             | ≥60 | Female |
| Low expression of CD47  | T3      | N0      | II             | ≥60 | Male   |
| Low expression of CD47  | T3      | N0      | II             | ≥60 | Female |
| High expression of CD47 | T4      | N2      | III            | ≥60 | Male   |
| Low expression of CD47  | T3      | N0      | II             | <60 | Male   |
| Low expression of CD47  | T4      | N0      | II             | ≥60 | Female |
| Low expression of CD47  | T3      | N0      | II             | ≥60 | Male   |
| Low expression of CD47  | T4      | N1      | III            | ≥60 | Male   |
| Low expression of CD47  | T4      | N2      | III            | ≥60 | Male   |
| Low expression of CD47  | T3      | N0      | II             | <60 | Female |
| Low expression of CD47  | T3      | N2      | III            | ≥60 | Female |
| High expression of CD47 | T4      | N2      | III            | ≥60 | Female |
| High expression of CD47 | T3      | N1      | III            | ≥60 | Male   |
| Low expression of CD47  | T3      | N0      | II             | ≥60 | Female |
| Low expression of CD47  | T3      | N0      | II             | ≥60 | Female |
| Low expression of CD47  | T3      | N2      | III            | ≥60 | Female |
| Low expression of CD47  | T3      | N0      | II             | ≥60 | Male   |
| Low expression of CD47  | T1      | N0      | I              | ≥60 | Female |
| Low expression of CD47  | T3      | N1      | III            | ≥60 | Female |
| Low expression of CD47  | T4      | N0      | II             | ≥60 | Female |
| Low expression of CD47  | T3      | N1      | III            | <60 | Female |
| Low expression of CD47  | T3      | N0      | II             | ≥60 | Male   |

|                         |    |    |     |     |        |
|-------------------------|----|----|-----|-----|--------|
| Low expression of CD47  | T3 | N0 | II  | ≥60 | Female |
| Low expression of CD47  | T3 | N0 | II  | ≥60 | Female |
| Low expression of CD47  | T3 | N0 | II  | ≥60 | Male   |
| Low expression of CD47  | T3 | N0 | II  | <60 | Female |
| Low expression of CD47  | T3 | N0 | II  | <60 | Female |
| High expression of CD47 | T3 | N2 | III | ≥60 | Female |
| High expression of CD47 | T4 | N1 | III | ≥60 | Female |
| Low expression of CD47  | T2 | N0 | II  | ≥60 | Female |
| Low expression of CD47  | T3 | N2 | III | ≥60 | Male   |
| Low expression of CD47  | T2 | N2 | III | ≥60 | Female |
| Low expression of CD47  | T2 | N0 | II  | <60 | Male   |
| Low expression of CD47  | T4 | N0 | II  | ≥60 | Male   |
| High expression of CD47 | T3 | N1 | III | ≥60 | Female |
| Low expression of CD47  | T3 | N2 | III | ≥60 | Male   |
| High expression of CD47 | T3 | N1 | III | ≥60 | Female |
| Low expression of CD47  | T1 | N1 | III | ≥60 | Female |
| Low expression of CD47  | T3 | N1 | III | ≥60 | Female |
| Low expression of CD47  | T2 | N0 | I   | ≥60 | Male   |
| Low expression of CD47  | T3 | N1 | III | ≥60 | Female |
| High expression of CD47 | T3 | N1 | III | <60 | Female |
| Low expression of CD47  | T3 | N1 | III | ≥60 | Female |
| Low expression of CD47  | T3 | N1 | III | ≥60 | Male   |
| Low expression of CD47  | T3 | N1 | III | ≥60 | Male   |
| High expression of CD47 | T3 | N2 | III | ≥60 | Male   |
| High expression of CD47 | T3 | N2 | III | <60 | Female |
| Low expression of CD47  | T2 | N0 | II  | ≥60 | Male   |
| Low expression of CD47  | T4 | N2 | III | ≥60 | Female |
| High expression of CD47 | T3 | N1 | III | <60 | Female |
| Low expression of CD47  | T3 | N0 | II  | ≥60 | Female |
| Low expression of CD47  | T2 | N0 | II  | <60 | Female |
| Low expression of CD47  | T3 | N2 | III | ≥60 | Female |
| Low expression of CD47  | T3 | N0 | I   | ≥60 | Female |
| Low expression of CD47  | T2 | N0 | II  | ≥60 | Female |
| Low expression of CD47  | T2 | N0 | II  | ≥60 | Male   |
| High expression of CD47 | T3 | N2 | III | ≥60 | Female |
| High expression of CD47 | T3 | N2 | III | ≥60 | Male   |
| Low expression of CD47  | T2 | N1 | III | ≥60 | Male   |
| Low expression of CD47  | T3 | N0 | II  | ≥60 | Male   |
| Low expression of CD47  | T2 | N0 | II  | ≥60 | Male   |
| Low expression of CD47  | T1 | N0 | I   | ≥60 | Male   |
| Low expression of CD47  | T2 | N0 | II  | ≥60 | Female |
