# Supplementary material for: The role of CD47 in immune escape of colon cancer and its correlation with heterogeneity of tumor immune microenvironment
Source: PeerJ journal article supplement (doi:10.7717/peerj.18579), 2024-12-09
Supplement: TableS2.xlsx [file TableS2.xlsx]

## Sheet: Sheet 1
id
